# Supplementary material for: A Detailed Examination of the Worldwide Impact of Type 2 Diabetes Linked to Dietary Risks: Insights from the Global Burden of Disease Study (1990-2021)
Source: Research Square preprint supplement (doi:10.21203/rs.3.rs-7168726/v1), 2025-07-28
Supplement: Supplementary file 1 [file 52802ad9126e3a819801cd10.docx]

**Table 2. Deaths of T2DM Between 1990 and 2021 at the Global and Country-Level.**

| Location | 1990  DALYs (95% UI) | 1990  ASR (95%UI) | 2021  DALYs (95% UI) | 2021  ASR (95%UI) | EAPC_CI |
| --- | --- | --- | --- | --- | --- |
| Global | 164,060  (30,935-265,372) | 4.55  (0.86-7.35) | 381,416  (74,328-620,914) | 4.52  (0.88-7.36) | 0.61 (0.29-0.93) |
| United States of America | 17,627  (3,785-27,385) | 5.42  (1.17-8.41) | 28,346  (7,190-43,601) | 4.78  (1.22-7.32) | -0.58  (-1.20- -0.03) |
| India | 15,576  (3,270-26,787) | 4.03  (0.83-6.98) | 58,566  (13,380-96,641) | 5.53  (1.26-9.14) | 2.01  (1.19-2.84) |
| People’s Republic of China | 12,614  (1,477-22,318) | 1.75  (0.21-3.10) | 37,437  (4,278-67,627) | 1.85  (0.21-3.34) | 1.63  (1.22-2.04) |
| Niue | 0  (0-1) | 19.79  (2.8-35.09) | 1  (0-1) | 27.22  (5.15-49.12) | 1.35  (1.06-1.64) |
| Tokelau | 0  (0-0) | 19.73  (2.49-35.55) | 0  (0-1) | 19.66  (3.11-34.8) | 0.46  (0.25-0.66) |
| Fiji | 187  (23-322) | 56.55  (6.73-96.87) | 484  (74-843) | 69.84  (10.94-121.19) | 1.46  (0.62-2.31) |
| Japan | 3,150  (732-5,055) | 1.9  (0.44-3.04) | 2,644  (662-4,290) | 0.62  (0.15-0.99) | -1.97  (-3.11- -0.81) |
| Singapore | 63  (8-112) | 3.06  (0.42-5.49) | 36  (6-61) | 0.43  (0.07-0.74) | -5.08  (-5.85- -4.3) |
