# Supplementary material for: A Detailed Examination of the Worldwide Impact of Type 2 Diabetes Linked to Dietary Risks: Insights from the Global Burden of Disease Study (1990-2021)
Source: Research Square preprint supplement (doi:10.21203/rs.3.rs-7168726/v1), 2025-07-28
Supplement: Supplementary file 2 [file 63eaaad994ee84ebd53471c5.docx]

**Table 1. DALYs of T2DM Between 1990 and 2021 at the Global and Country-Level.**

| Location | 1990  DALYs (95% UI) | 1990  ASR (95%UI) | 2021  DALYs (95% UI) | 2021  ASR (95%UI) | EAPC_CI |
| --- | --- | --- | --- | --- | --- |
| Global | 6,450,217  (1,256,122-10,613,945) | 159.96  (31.17-262.82) | 19,146,810  (4,147,239-31,937,618) | 221.34  (47.97-368.92) | 1.59  (1.37-1.81) |
| People’s Republic of China | 769,703  (99,186- 1,395,086) | 85.11  (10.99-153.98) | 2,702,413  (337,623-4,927,021) | 133.19  (16.98-244.54) | 2.5  (2.21-2.8) |
| United States of America | 663,227  (149,822-1,054,918) | 217.72  (49.39-345.99) | 1,993,463  (537,271-3,239,962) | 371.91  (101.84-602.74) | 1.99  (1.53-2.44) |
| India | 626,542  (135,796-1,076,371) | 129.67  (27.66-223.58) | 2,393,928  (588,406-4,005,473) | 194.55  (47.19-325.89) | 2.03  (1.47-2.6) |
| Niue | 13  (2-23) | 620.62  (94.31-1096.73) | 21  (4-36) | 968.74  (192.59-1711.31) | 1.8  (1.53-2.07) |
| Tokelau | 9  (1-15) | 650.86  (88.63-1134.23) | 12  (2-21) | 805.96  (142.47-1434.09) | 1.04  (0.87-1.21) |
| Fiji | 6,261  (805-10,602) | 1564.95  (192.91-2655.79) | 16,164  (2,592-27,913) | 1978.51  (322.59-3413.58) | 1.51  (0.93-2.09) |
| Trinidad and Tobago | 8,517  (2,333-13,588) | 1000.11  (272.52-1597.98) | 18,220  (5,156-30,739) | 947.99  (271.66-1595.52) | 0.55  (0.25-0.85) |
| Marshall Island | 160  (19-282) | 891.36  (99.58-1585.17) | 602  (86-1,084) | 1451.00  (196.04-2622.39) | 2.73  (1.76-3.72) |
| Democratic People’s Republic of Korea | 9,732  (1,624-17,749) | 55.93  (9.37-101.70) | 30,056  (5,551-52,925) | 89.72  (16.71-157.68) | 2.33  (2.15-2.5) |
