# Supplementary material for: A Detailed Examination of the Worldwide Impact of Type 2 Diabetes Linked to Dietary Risks: Insights from the Global Burden of Disease Study (1990-2021)
Source: Research Square preprint supplement (doi:10.21203/rs.3.rs-7168726/v1), 2025-07-28
Supplement: Supplementary file 3 [file 7cc465fe8716ab9d6c66b184.docx]

**Table 3. Global Burden of T2DM Attributable to Dietary Risks Across Various SDI Levels.**

| SDI | High SDI | High-middle SDI | Middle SDI | Low-middle SDI | Low SDI |
| --- | --- | --- | --- | --- | --- |
| DALYs | | | | | |
| 1990 DALYs (95%UI) | 1,762,948  (387,134-2,838,065) | 1,475,207  (324,314-2,399,511) | 1,515,583  (264,009-2,607,534) | 1,066,910  (195,040-1,811,700) | 618,717  (91,674-1,037,127) |
| 1990 ASR (95%UI) | 162.69  (35.89-261.87) | 147.92  (32.67-240.25) | 138.06  (23.96-237.56) | 169.33  (30.76-288.55) | 260.26  (37.77-436.80) |
| 2021 DALYs (95%UI) | 4,561,220  (1,135,855-7,539,088) | 3,685,088  (802,268-6,213,404) | 5,454,307  (1,096,697-9,350,533) | 3,809,852  (855,743-6,298,732) | 1,613,831  (283,462-2,685,994) |
| 2021 ASR (95%UI) | 247.38  (62.69-408.23) | 192.42  (41.84-324.99) | 197.22  (39.52-337.88) | 254.14  (55.93-422.80) | 292.19  (50.31-492.72) |
| EAPC_CI | 0.74 (0.67-0.80) | 1.19 (1.09-1.30) | 1.34 (1.30-1.39) | 0.23 (0.17-0.29) | 1.12 (1.10-1.15) |
| Deaths | | | | | |
| 1990 Deaths (95%UI) | 48,299  (9,767-76,055) | 35,079  (7,481-55,027) | 34,231  (5,801-58,053) | 28,451  (4,844-47,898) | 17,725  (2,409-29,621) |
| 1990 ASR (95%UI) | 4.34  (0.88-6.82) | 3.92  (0.85-6.15) | 3.81  (0.65-6.49) | 5.47  (0.91-9.28) | 8.91  (1.20-14.89) |
| 2021 Deaths (95%UI) | 71,110  (16,004-111,740) | 69,853  (14,480-112,417) | 112,706  (20,139-190,402) | 89,481  (17,366-146,054) | 37,785  (5,837-63,034) |
| 2021 ASR (95%UI) | 3.16  (0.72-4.94) | 3.57  (0.74-5.74) | 4.43  (0.78-7.49) | 7.01  (1.34-11.53) | 8.68  (1.33-14.53) |
| EAPC_CI | -1.39 (-1.64- -1.14) | -0.41 (-0.52- -0.3) | 0.53 (0.48-0.58) | 0.83 (0.79-0.87) | -0.2 (-0.27- -0.13) |
| YLDs | | | | | |
| 1990 YLDs (95%UI) | 799,381  (182,844-1,385,997) | 715,384  (155,615-1,242,045) | 633,688  (114,579-1,177,332) | 352,971  (66,074-633,806) | 14,2302  (22,714-254,641) |
| 1990 ASR (95%UI) | 74.85  (17.18-129.50) | 69.93  (15.27-121.16) | 54.39  (9.68-101.21) | 52.20  (9.58-94.85) | 56.73  (9.09-102.79) |
| 2021 YLDs (95%UI) | 3,240,039  (805,371-5,567,299) | 2,336,437  (498,263-4,050,218) | 2,801,945  (575,302-5,036,205) | 170,6395  (397,521-3,019,290) | 638,199  (110,126-1,136,406) |
| 2021 ASR (95%UI) | 180.96  (45.96-307.79) | 124.16  (26.44-216.17) | 100.06  (20.53-180.15) | 107.45  (24.94-191.51) | 104.84  (17.62-189.03) |
| EAPC_CI | 2.91 (2.83-3.00) | 1.83 (1.77-1.89) | 1.95 (1.94-1.97) | 2.38 (2.30-2.46) | 1.92 (1.89-1.95) |
| YLLs | | | | | |
| 1990 YLLs (95%UI) | 963,567  (196,172-1,509,512) | 759,823  (160,402-1,191,957) | 881,895  (151,406-1,490,314) | 713,939  (124,536-1,196,122) | 476,415  (65,586-796,558) |
| 1990 ASR (95%UI) | 87.85  (17.96-137.51) | 77.99  (16.58-122.45) | 83.66  (14.26-141.55) | 117.12  (20.07-196.94) | 203.53  (27.77-339.88) |
| 2021 YLLs (95%UI) | 1,321,181  (308,456-2,048,555) | 1,348,651  (278,787-2,165,404) | 2,652,363  (490,188-4,437,487) | 2,103,458  (416,811-3,406,099) | 975,632  (152,301-1,606,703) |
| 2021 ASR (95%UI) | 66.43  (15.85-102.21) | 68.25  (14.14-109.48) | 97.16  (17.84-162.90) | 146.69  (28.74-238.51) | 187.36  (28.98-312.63) |
| EAPC_CI | -1.29 (-1.52- -1.06) | -0.64 (-0.77- -0.50) | 0.45 (0.41-0.49) | 0.76 (0.73-0.79) | -0.43 (-0.50- -0.36) |
