# Supplementary material for: A Detailed Examination of the Worldwide Impact of Type 2 Diabetes Linked to Dietary Risks: Insights from the Global Burden of Disease Study (1990-2021)
Source: Research Square preprint supplement (doi:10.21203/rs.3.rs-7168726/v1), 2025-07-28
Supplement: Supplementary file 4 [file ab529f5b42abda5324b9b356.docx]

**Table 6. Global Trends in Deaths Due to Dietary Risk-Induced T2DM Across Regions.**

| Location | 1990  DALYs (95% UI) | 1990  ASR (95%UI) | 2021  DALYs (95% UI) | 2021  ASR (95%UI) | EAPC_CI |
| --- | --- | --- | --- | --- | --- |
| Global | 164,060  (30,935-265,372) | 4.55  (0.86-7.35) | 381,416  (74,328-620,914) | 4.52  (0.88-7.36) | 0.61 (0.29-0.93) |
| Advanced Health System | 72,002  (15,446-111,809) | 4.42  (0.95-6.87) | 112,591  (25,987-175,303) | 3.66  (0.85-5.65) | -0.14  (-0.78-0.5) |
| World Bank High Income | 63,906  (13,387-99,570) | 4.89  (1.03-7.61) | 88,870  (20,325-138,668) | 3.44  (0.8-5.33) | -0.61  (-1.32-0.1) |
| Asia | 57,953  (10,386-97,935) | 3.31  (0.59-5.58) | 175,271  (33,147-289,931) | 3.62  (0.68-6) | 1.32  (0.83-1.81) |
| Europe | 45,616  (9,978-70,479) | 4.45  (0.98-6.88) | 69,223  (15,741-106,813) | 3.94  (0.6-6.05) | 0.27  (-0.41-0.96) |
| America | 38,533  (7,504-61,638) | 6.38  (1.24-10.21) | 81,938  (17,521-132,410) | 6.05  (1.3-9.78) | 0.17  (-0.07-0.40) |
| Australasia | 935  (165-1,508) | 4.07  (0.72-6.56) | 1,861  (362-2,945) | 3.15  (0.61-4.94) | -0.34  (-0.96-0.27) |
| Andean Latin America | 769  (151-1,295) | 3.93  (0.75-6.63) | 2,611  (479-4,588) | 4.51  (0.82-7.91) | 1.34  (0.75-1.94) |
| Oceania | 686  (109-1,194) | 25.9  (4.11-44.44) | 1,788  (287-3,031) | 26.27  (4.25-44.14) | 0.36  (-0.77-1.5) |
| World Bank Lower Middle Income | 44,489  (8,095-74,752) | 4.96  (0.89-8.40) | 142,845  (29,108-233,417) | 6.47  (1.31-10.62) | 1.47  (0.61-2.33) |
| Basic Health System | 45,224  (7,087-76,842) | 3.49  (0.55-5.95) | 134,193  (22,846-227,963) | 3.74  (0.63-6.36) | 1.44  (0.99-1.9) |
| Eastern Europe | 4,460  (929-6,784) | 1.58  (0.33-2.4) | 16,211  (3,665-25,028) | 4.47  (1.01-6.9) | 2.68  (1.56-3.82) |
| High-income Asia Pacific | 4,308  (938-7,000) | 2.21  (0.48-3.6) | 5,092  (1,063-8,444) | 0.99  (0.2-1.61) | -1.19  (-2.05- -0.32) |
