# Supplementary material for: A Detailed Examination of the Worldwide Impact of Type 2 Diabetes Linked to Dietary Risks: Insights from the Global Burden of Disease Study (1990-2021)
Source: Research Square preprint supplement (doi:10.21203/rs.3.rs-7168726/v1), 2025-07-28
Supplement: Supplementary file 5 [file b0328f99fd7e8b31f9ea2553.docx]

**Table 5. Global Burden in DALYs Distribution Due to Dietary Risk-Induced T2DM Across Regions.**

| Location | 1990  DALYs (95% UI) | 1990  ASR (95%UI) | 2021  DALYs (95% UI) | 2021  ASR (95%UI) | EAPC_CI |
| --- | --- | --- | --- | --- | --- |
| Global | 6,450,217  (1,256,122-10,613,945) | 159.96  (31.17-262.82) | 19,146,810  (4,147,239-31,937,618) | 221.34  (47.97-368.92) | 1.59  (1.37-1.81) |
| Advanced Health System | 2,683,405  (620,596-4,281,742) | 166.35  (38.64-265.16) | 6,363,945  (1,632,591-10,369,271) | 247.55  (64.44-401.37) | 1.65  (1.14-2.17) |
| Asia | 2,616,083  (477,634-4,468,832) | 123.05  (22.49-210.03) | 9,250,507  (1,785,180-15,808,286) | 179.15  (34.60-305.89) | 2.03  (1.72-2.34) |
| World Bank High Income | 2,259,818  (513,137-3,612,101) | 178.79  (40.81-285.68) | 5,305,431  (1,347,879-8,698,552) | 255.43  (66.12-417.07) | 1.54  (0.99-2.08) |
| Europe | 1,620,459  (382,412-2,569,792) | 158.63  (37.64-251.34) | 3,158,446  (805,892-5,084,629) | 216.49  (55.87-346.31) | 1.39  (0.83-1.94) |
| America | 1,459,950  (304,313-2,388,364) | 238.44  (49.57-389.89) | 4,424,056  (1,056,703-7,382,646) | 338.43  (81.24-564.04) | 1.62  (1.43-1.8) |
| Basic Health System | 2,059,399  (337,459-3,546,040) | 131.69  (21.35-225.52) | 7,167,502  (1,343,390-12,431,301) | 187.56  (35.14-324.75) | 2.12  (1.83-2.41) |
| World bank upper-middle income | 2,045,619  (370,644-3,490,999) | 130.30  (23.57-222.16) | 6,580,176  (1,240,051-11,351,849) | 188.65  (35.64-326.01) | 2.05  (1.81-2.29) |
| Australasia | 32,163  (6,003-52,803) | 138.34  (25.94-226.59) | 85,146  (17,702-143,240) | 169.44  (35.79-286.11) | 1.06  (0.6-1.53) |
| Andean Latin America | 29,000  (6,298-49,770) | 134.57  (28.30-232.81) | 116,689  (25,094-201,584) | 192.80  (41.00-334.98) | 1.95  (1.45-2.45) |
| Oceania | 24,390  (3,995-41,680) | 742.10  (117.64-1266.63) | 73,953  (13,438-124,792) | 862.05  (154.31-1465.64) | 0.83  (-0.01-1.69) |
| East Asian | 813,257  (104,457-1,477,201) | 86.82  (11.17-156.93) | 2,835,683  (357,683-5,172,916) | 134.85  (17.33-247.24) | 2.44  (2.15-2.73) |
