# Supplementary material for: A Detailed Examination of the Worldwide Impact of Type 2 Diabetes Linked to Dietary Risks: Insights from the Global Burden of Disease Study (1990-2021)
Source: Research Square preprint supplement (doi:10.21203/rs.3.rs-7168726/v1), 2025-07-28
Supplement: Supplementary file 7 [file fecbae813b87d847270f66e5.docx]

**Table 4：Gender Differences in the Global Impact of Dietary Risks on T2DM Distribution.**

| Index | Sex | 1990 Number  (95% UI) | 1990 ASR (95% UI) | 2021 Number  (95% UI) | 2021 ASR (95% UI) | EAPC_CI |
| --- | --- | --- | --- | --- | --- | --- |
| DALYs | Both | 6,450,217  (1,256,122-10,613,945) | 159.96  (31.17-262.82) | 19,146,810  (4,147,239-31,937,618) | 221.34  (47.97-368.92) | 0.96 (0.92-1.01) |
| Male | 3,134,601  (615,407-5,196,822) | 165.89  (32.56-274.73) | 9,750,524  (2,078,052-16,367,491) | 236.94  (50.42-397.97) | 1.07 (1.03-1.12) |
| Female | 3,315,616  (640,715-5,432,411) | 154.61  (29.91-253.10) | 9,396,286  (2,069,187-15,612,534) | 207.18  (45.75-344.06) | 0.85 (0.8-0.9) |
| Deaths | Both | 164,060  (30,935-265,372) | 4.55  (0.86-7.35) | 381,416  (74,328-620,914) | 4.52  (0.88-7.36) | -0.15 (-0.22- -0.07) |
| Male | 73,567  (14,152-120,130) | 4.65  (0.89-7.55) | 183,717  (34,692-301,286) | 4.85  (0.92-7.95) | 0.02 (-0.06- 0.11) |
| Female | 90,493  (16,783-146,848) | 4.47  (0.83-7.26) | 197,699  (39,636-324,534) | 4.25  (0.85-6.98) | -0.3 (-0.38- -0.23) |
| YLDs | Both | 2,647,950  (553,253-4,678,966) | 63.55  (13.29-112.56) | 10,734,857  (2,435,669-18,705,254) | 124.01  (28.15-216.28) | 2.17 (2.13-2.21) |
| Male | 1,324,050  (271,514-2,352,382) | 66.82  (13.71-118.84) | 5,493,441  (1,231,653-9,641,496) | 132.08  (29.59-232.38) | 2.2 (2.16-2.24) |
| Female | 1,323,900  (281,653-2,337,455) | 60.65  (12.90-107.06) | 5,241,416  (1,204,016-9,089,462) | 116.62  (26.84-202.35) | 2.13 (2.09-2.16) |
| YLLs | Both | 3,802,267  (718,525-6,152,372) | 96.41  (18.22-155.98) | 8,411,953  (1,660,756-13,664,004) | 97.33  (19.23-158.11) | -0.13 (-0.2- -0.05) |
| Male | 1,810,551  (350,727-2,965,802) | 99.08  （19.15-61.81） | 4,257,083  (812,868-6,934,624) | 104.86  (20.01-171.09) | 0.05 (-0.02- -0.12) |
| Female | 1,991,716  (367,798-3,226,579) | 93.96  （17.38-52.19） | 4,154,870  (847,888-6,782,492) | 90.56  (18.53-47.81) | -0.3 (-0.39- -0.22) |
